# Supplementary material for: Resistance of Permafrost and ModernAcinetobacter lwoffiiStrains to Heavy Metals and Arsenic Revealed by Genome Analysis
Source: Hindawi journal article supplement (doi:10.1155/2016/3970831), 2016-01-01
Supplement: f1 [file 3970831.f1.pdf]

Table S1. Contigs of clinical *A.lwoffii* strains carrying heavy metal resistance determinants closely related to determinants of ancient plasmids

| Strain of <i>A. lwoffii</i> | Contigs with determinants of resistance to                    |                                                              |                                                            |                                                              |                                                             |
|-----------------------------|---------------------------------------------------------------|--------------------------------------------------------------|------------------------------------------------------------|--------------------------------------------------------------|-------------------------------------------------------------|
|                             | mercury                                                       | arsenicum                                                    | chromium                                                   | copper                                                       | cobalt/zinc/cadmium                                         |
| NCTC 5866                   | <b>adgTz-supercont2.5.C9</b><br>14351 bp,<br>AYHO01000009     | <b>adgTz-supercont2.5.C9,</b><br>14351 bp,<br>AYHO01000009   | <b>adgTz-supercont2.5.C9,</b><br>14351 bp,<br>AYHO01000009 | adgTz-supercont2.6.C10,<br>14188 bp,<br>AYHO01000010         | -                                                           |
| NIPH 478                    | -                                                             | <b>acLZS-supercont1.3.C4</b><br>131122 bp*,<br>APQU01000004  | acLZS-supercont1.9.C26,<br>20292 bp,<br>APQU01000026       | acLZS-supercont1.3.C3,<br>17981 bp,<br>APQU01000003          | <b>acLZS-supercont1.3.C4</b><br>131122 bp,<br>APQU01000004  |
| NIPH715                     | <b>acLrE-supercont1.22.C69</b><br>, 33082 bp,<br>APOT01000069 | <b>acLrE-supercont1.22.C69,</b><br>33082 bp,<br>APOT01000069 | -                                                          | <b>acLrE-supercont1.22.C69,</b><br>33082 bp,<br>APOT01000069 | acLrE-supercont1.22.C68,<br>79564 bp,<br>APOT01000068       |
| CIP 70.31                   | -                                                             | -                                                            | acLsr-supercont1.3.C10,<br>7846 bp,<br>APQT01000010        | <b>acLsr-supercont1.11.C59</b><br>64431 bp *<br>APQT01000059 | <b>acLsr-supercont1.11.C59,</b><br>64431 bp<br>APQT01000059 |
| TG19636                     | -                                                             | -                                                            | -                                                          | -                                                            | TG19636 223, 13100 bp,<br>AMJG01000222                      |
| SH145                       | -                                                             | -                                                            | -                                                          | -                                                            | cont1.149, 25730 bp,<br>ACPN01000149                        |

|             |                                               |                                               |                                               |                                                                               |   |
|-------------|-----------------------------------------------|-----------------------------------------------|-----------------------------------------------|-------------------------------------------------------------------------------|---|
| NBRC 109760 | <b>ALW03_CON00057, 14170 bp, BBSQ01000057</b> | <b>ALW03_CON00057, 14170 bp, BBSQ01000057</b> | <b>ALW03_CON00057, 14170 bp, BBSQ01000057</b> | ALW03_CON00054, 15382 bp, BBSQ01000054; ALW03_CON00074, 3744bp*, BBSQ01000074 | - |
|-------------|-----------------------------------------------|-----------------------------------------------|-----------------------------------------------|-------------------------------------------------------------------------------|---|

\*not complete

Table S2. Genes of *ars* operon (*trxB-arsH-arsB-arsC-arsR-arsC*) revealed on different contigs (presumably chromosome regions) of *A. lwoffii* clinical strains

| Strain                        | Contig [AC]                           | Genes                           | Identity (%) *          |
|-------------------------------|---------------------------------------|---------------------------------|-------------------------|
| <i>A. lwoffii</i> NCTC 5866   | 0087 [AIEL01000087]                   | <i>arsH-arsB-arsC</i>           | 77%; 68%; 74%           |
|                               | 0016 [AIEL01000016]                   | <i>arsC-arsR</i>                | 83%; 68%                |
|                               | 0095 [AIEL01000095]                   | <i>trxB</i>                     | 77%                     |
| <i>A. lwoffii</i> NIPH 478    | aclZS-supercont1.5.C10 [APQU01000010] | <i>arsC-arsR</i>                | 83%; 68%                |
|                               | aclZS-supercont1.5.C12 [APQU01000012] | <i>trxB</i>                     | 77%                     |
| <i>A. lwoffii</i> NBRC 109760 | ALW03_CON00003 [BBSQ01000003]         | <i>arsC-arsR</i>                | 83%; 68%                |
|                               | ALW03_CON00040 [BBSQ01000040]         | <i>arsH-ars-arsC</i>            | 76%; 78%; 68%           |
|                               | ALW03_CON00021 [BBSQ01000021]         | <i>trxB</i>                     | 77%                     |
| <i>A. lwoffii</i> ED23-35     | 7                                     | <i>arsH-arsB-arsC-arsR-arsC</i> | 86%; 87%, 81%, 75%, 68% |
|                               | 36                                    | <i>trxB</i>                     | <40%**                  |
| <i>A. lwoffii</i> VS15        | 18                                    | <i>arsH-arsB-arsC-arsR-arsC</i> | 86%; 87%, 81%, 75%, 67% |
|                               | 27                                    | <i>arsH</i>                     | 92%                     |
|                               | 11                                    | <i>trxB</i>                     | <40%**                  |

\*in relation to nucleotide sequences (100%) of *ars* genes from pALWED2.1

\*\* identity at the amino acid sequence level

Table S3. Genome size of *A. lwoffii* clinical isolates

| Strain                            | AC                  | Whole genome size        |
|-----------------------------------|---------------------|--------------------------|
| NCTC 5866 (= CIP64.10 = NIPH 512) | NZ_AIEL0100000000.1 | 3,353,128                |
| NIPH 512                          | NZ_AYHO00000000.1   | 3,382,003                |
| NIPH 478                          | NZ_APQU00000000.1   | 3,276,129                |
| NIPH 715                          | NZ_APOT00000000.1   | 3,400,693                |
| CIP 70.31                         | NZ_APQT00000000.1   | 3,546,109                |
| TG19636                           | NZ_AMJG00000000.1   | 3,497,784                |
| SH145                             | NZ_ACPN00000000.1   | 3,347,001                |
| WJ10621*                          | NZ_CM001194.1       | 3,419,011<br>3,184,320** |
| Average size of whole genome      |                     | 3,400,407                |

\*Carries a plasmid pNDM-BJ01 (47,274 bp)[NC\_019268.1] with the gene bla<sub>NDM-1</sub>;

\*\*Main genome size

Table S4. Characteristics of genomes of *A. baumannii* strains

| Strain             | AC       | Main genome size | No of plasmids | Plasmid size, (bp)                | Whole genome size, (bp) |
|--------------------|----------|------------------|----------------|-----------------------------------|-------------------------|
| AB0057             | CP001182 | 4,050,513        | 1              | 8,729                             | 4,059,242               |
| Ab04-mff           | CP012006 | 3,935,688        | 2              | 169,023;<br>87,569                | 4,192,280               |
| AB307-0294,        | CP001172 | 3,760,981        | -              | -                                 | 3,760,981               |
| AB5075-UW          | CP008706 | 3,972,672        | 3              | 83,610;<br>8,731; 1,967           | 4,066,980               |
| AC29               | CP007535 | 3,851,648        | 2              | 74,749; 8,737                     | 3,935,134               |
| ACICU              | CP000863 | 3,904,116        | 2              | 64,366;<br>28,279                 | 3,996,761               |
| ATCC 17978         | CP000521 | 3,976,747        | 2              | 13,408;<br>11,302                 | 4,001,457               |
| ATCC 17978-<br>mff | CP012004 | 3,857,743        | 1              | 148,955                           | 4,006,698               |
| AYE                | CU459141 | 3,936,291        | 4              | 94,413;<br>9,661; 5,644;<br>2,726 | 4,048,735               |
| BJAB07104          | CP003846 | 3,951,920        | 2              | 70,170;<br>20,139                 | 4,042,229               |

|             |          |           |   |                                   |           |
|-------------|----------|-----------|---|-----------------------------------|-----------|
| BJAB0715    | CP003847 | 4,001,621 | 1 | 52,268                            | 4,053,889 |
| BJAB0868    | CP003849 | 3,906,795 | 3 | 70,167;<br>20,139; 8,721          | 4,005,822 |
| CIP70.10    | LN865143 | 3,928,513 | 1 | 7,742                             | 3,936,255 |
| D36         | CP012952 | 4,063,596 | 4 | 47,457;<br>9,276; 6,078;<br>4,754 | 4,131,161 |
| D1279779    | CP003967 | 3,704,284 | 1 | 7,416                             | 3,711,700 |
| IOMTU433    | AP014649 | 4,000,970 | 1 | 189,354                           | 4,190,324 |
| KBN10P02143 | CP013924 | 4,086,879 | 1 | 52,517                            | 4,139,396 |
| MDR-TJ      | CP003500 | 3,964,912 | 2 | 110,967;<br>77,528                | 4,153,407 |
| MDR-ZJ06    | CP001937 | 3,991,133 | 1 | 20,301                            | 4,011,434 |
| NCGM 237    | AP013357 | 4,021,920 | - | -                                 | 4,021,920 |
| PKAB07      | CP006963 | 4,233,806 | 1 | 8,805                             | 4,242,611 |
| R2090       | LN868200 | 3,819,158 | - | -                                 | 3,819,158 |
| R2091       | LN997846 | 3,939,746 | 1 | 7,742                             | 3,947,488 |
| SDF         | CU468230 | 3,421,954 | 3 | 25,014;<br>24,922; 6,106          | 3,477,996 |

|               |          |           |   |                           |           |
|---------------|----------|-----------|---|---------------------------|-----------|
| TCDC-AB0715   | CP002522 | 4,138,388 | 2 | 70,894; 8,731             | 4,218,013 |
| TYTH-1        | CP003856 | 3,957,368 | 1 | 65,890                    | 4,023,258 |
| XH386         | CP010779 | 4,087,157 | 1 | 112,157                   | 4,199,314 |
| YU-R612       | CP014217 | 4,075,545 | 2 | 74,241; 5,465             | 4,155,251 |
| ZW85-1        | CP006768 | 3,763,012 | 2 | 113,866;<br>48,368        | 3,925,246 |
| 1656-2        | CP001921 | 3,940,614 | 2 | 74,451; 8,041             | 4,023,106 |
| 6200          | CP010397 | 3,902,527 | 3 | 114,848;<br>47,274; 9,327 | 4,073,976 |
| average value | -        | 3,939,942 | 2 | -                         | 4,018,426 |
